# Supplementary material
Source: publisher figshare collection journal article supplement (https://plos.figshare.com/articles/dataset/_/123564)
Supplement: Supplementary file [file 1]

## Supplementary Table

Table S1. **Node support (ML bootstrap percentage (BP) and Bayesian posterior probability (PP)) for phylogenetic analyses.** Node numbers refer to the phylogeny in Figures 3 and S1.

Dashes refer to nodes with <50 BS or 0.5 PP support.

| Node# | ML              |               | Bayes           |               |
|-------|-----------------|---------------|-----------------|---------------|
|       | Constrained (C) | Unconstrained | Constrained (C) | Unconstrained |
| 1     | -               | -             | -               | -             |
| 3     | -               | -             | -               | -             |
| 5     | -               | -             | 0.78            | 0.8           |
| 6     | -               | -             | -               | -             |
| 7     | 65              | 67            | 0.97            | 0.98          |
| 10    | 83              | 79            | 1.0             | 0.99          |
| 11    | 92              | 89            | 1.0             | 1.0           |
| 14    | 87              | 87            | 1.0             | 1.0           |
| 17    | -               | -             | -               | -             |
| 18    | -               | -             | -               | -             |
| 19    | -               | -             | 0.57            | 0.66          |
| 21    | C, 97           | 90            | C, 1.0          | 1.0           |
| 23    | -               | 53            | -               | 0.56          |
| 26    | -               | -             | 0.54            | 0.5           |
| 28    | C, 74           | -             | C, 1.0          | 0.97          |
| 30    | -               | -             | 0.51            | 0.53          |
| 32    | 68              | 56            | 0.94            | 0.93          |
| 35    | -               | -             | 0.74            | 0.77          |
| 36    | -               | -             | -               | -             |
| 37    | -               | -             | 0.59            | 0.62          |
| 39    | C, 94           | 92            | C, 1.0          | 1.0           |
| 41    | 75              | 75            | 0.94            | 0.95          |
| 44    | -               | -             | -               | -             |
| 45    | -               | -             | -               | -             |
| 47    | -               | -             | 0.65            | 0.59          |
| 49    | -               | -             | -               | -             |
| 51    | 55              | 52            | 0.91            | 0.9           |
| 54    | -               | -             | 0.67            | 0.67          |
| 56    | -               | -             | -               | 0.5           |
| 58    | -               | -             | -               | -             |
| 59    | 82              | 82            | 1.0             | 1.0           |
| 61    | 83              | 80            | 1.0             | 1.0           |
| 63    | 93              | 93            | 1.0             | 1.0           |
| 65    | 56              | -             | -               | -             |
| 68    | -               | -             | -               | -             |
| 69    | 70              | 72            | 0.93            | 0.93          |

|     |       |     |  |        |      |
|-----|-------|-----|--|--------|------|
| 72  | -     | -   |  | 0.94   | 0.95 |
| 74  | 59    | 54  |  | 0.97   | 0.97 |
| 76  | 98    | 97  |  | 1.0    | 1.0  |
| 79  | -     | -   |  | 0.98   | 0.98 |
| 80  | -     | -   |  | 0.84   | 0.61 |
| 82  | 100   | 100 |  | 1.0    | 1.0  |
| 85  | -     | -   |  | 0.61   | 0.5  |
| 86  | C, -  | -   |  | C, 1.0 | -    |
| 87  | 82    | 69  |  | 1.0    | 0.99 |
| 89  | 67    | 61  |  | 0.81   | 0.82 |
| 91  | 98    | 98  |  | 1.0    | 1.0  |
| 94  | -     | -   |  | 0.94   | 0.71 |
| 95  | 63    | -   |  | 0.99   | 0.94 |
| 97  | 95    | 94  |  | 1.0    | 1.0  |
| 100 | 82    | 77  |  | 0.96   | 0.96 |
| 101 | 100   | 100 |  | 1.0    | 1.0  |
| 104 | 99    | 99  |  | 1.0    | 1.0  |
| 107 | -     | -   |  | -      | -    |
| 108 | C, 55 | -   |  | C, 1.0 | -    |
| 110 | -     | -   |  | 0.69   | -    |
| 113 | C, 91 | -   |  | C, 1.0 | 0.99 |
| 115 | 100   | 100 |  | 1.0    | 1.0  |
